# Supplementary material for: Caenorhabditis elegans exhibits positive gravitaxis
Source: PubMed Central journal article supplement (PMC8439010; doi:10.1186/s12915-021-01119-9), 2021-09-14
Supplement: 12915_2021_1119_MOESM1_ESM.pdf [file 12915_2021_1119_MOESM1_ESM.pdf]

**Additional File 1: Supplemental Information. Figures S1-S30. Tables S1-S3.**

***Caenorhabditis elegans* Exhibits Positive Gravitaxis**

Wei-Long Chen<sup>1,2,3</sup>, Hungtang Ko<sup>1,4</sup>, Han-Sheng Chuang<sup>2</sup>, David M. Raizen<sup>3,\*</sup>, and

Haim H. Bau<sup>1,\*\*</sup>

1. Dept. Mechanical Engineering and Applied Mechanics, University of Pennsylvania, Philadelphia, PA. USA
2. Department of Biomedical Engineering, National Cheng Kung University (NCKU), Tainan, Taiwan.
3. Dept. of Neurology, Perelman School of Medicine, University of Pennsylvania, Philadelphia, PA. USA
4. Current address: School of Mechanical Engineering, Georgia Institute of Technology, Atlanta, GA, USA

\* [raizen@penncmedicine.upenn.edu](mailto:raizen@penncmedicine.upenn.edu)

\*\* [bau@seas.upenn.edu](mailto:bau@seas.upenn.edu)

## Table of Contents

- S1. Image processing and data analysis
- S2. Calibration jig for image processing verification
- S3. Kernel distribution estimate (KDE)
- S4. Reproducibility and Potential Artifacts
- S5. Cuvette material does not affect worms' behavior.
- S6. Von Mises – Fisher probability distribution function
- S7. Kernel Distribution Estimate (KDE) of well-fed wild type animals at various depths beneath the liquid surface.
- S8. Motion-impaired animals do not gravitax
- S9. Starved WT and motion-impaired animals (*unc-29*) align with the direction of gravity at a lower rate than well-nourished WT animals.
- S10. *C. elegans* mutant for the gene *osm-6* or for the gene *che-2* do not gravitax
- S11. *C. elegans* mutant for the gene *mec-3* or for the gene *mec-4* do not gravitax
- S12. Dopamine-deficient worms are deficient in gravitaxis.
- S13. Pharmacological dopamine rescues gravitaxis defect
- S14. Comparison of the swimming gaits of WT, *osm-6*, *cat-2*, and pharmaceutically treated *cat-2*
- S15. Well-fed adult worms of the AB1 Adelaide strain align their direction of swimming with the direction of the gravity vector.
- S16. *C. elegans* on agar does not gravitax
- S17. Top heavy cylinders settle broadside.

Table S1. Summary of our experiments

Table S2. Fraction of censored animals by strain

Table S3. Likelihood test for KDEs

## S1. Image Processing and Data Analysis

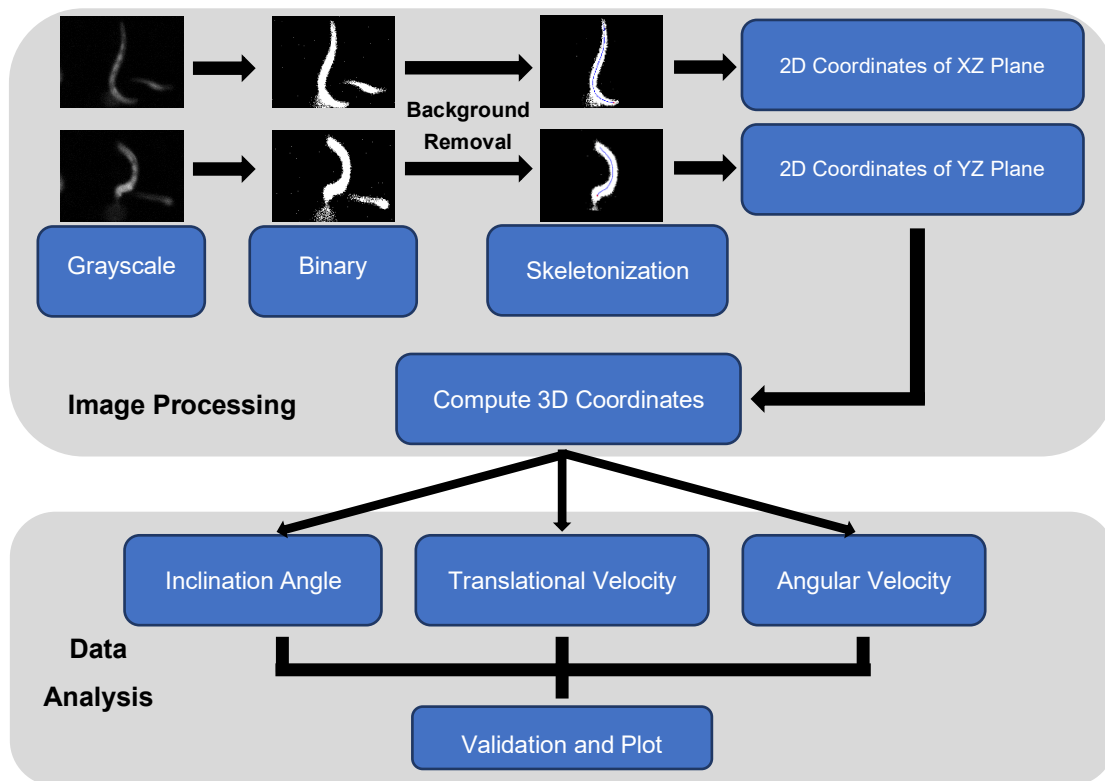

**Fig. S1: Schematic depiction of image processing and data analysis.** The X-Z and Y-Z projections of a worm were captured with cameras 1 and 2, respectively. The red dot and blue lines in the skeletonization step identify, respectively, the worm's head and skeleton.

## S2. Calibration Jig for Image Processing Verification

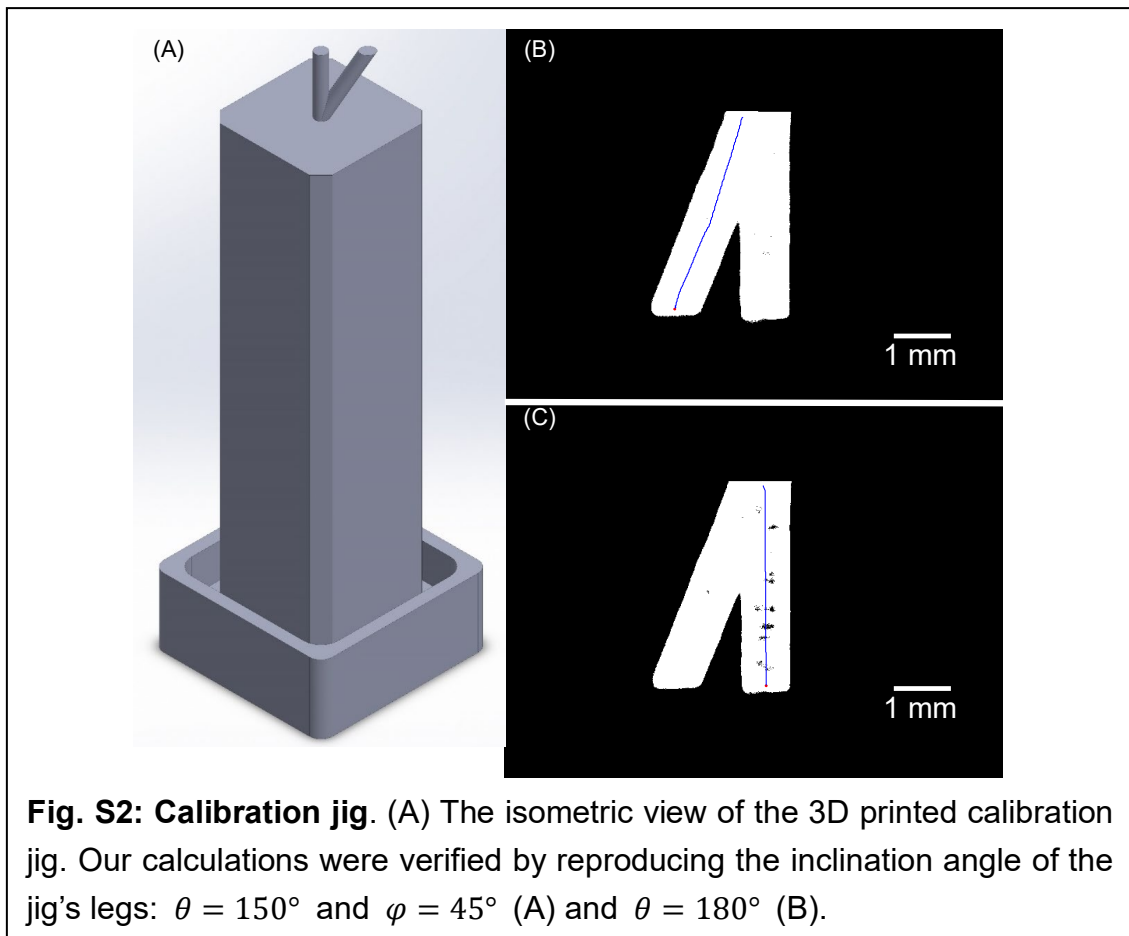

To verify our analysis, we 3D-printed (Formlabs, Form 2) a calibration jig (**Fig. S2**). The jig includes a square base sized to fit tightly into our cuvette, a vertical leg ( $\theta = 180^\circ$ ) located at the jig base's center, and an inclined leg ( $\theta = 150^\circ$ ,  $\varphi = 45^\circ$ ).

We calculated the angle of the inclined leg as  $\theta=149.6^\circ \pm 2.1^\circ$  and the vertical leg  $\theta=179.81^\circ \pm 1.07^\circ$ . We estimate that our calculation of the inclination angle is accurate within  $3.5^\circ$ . The cameras are aligned within  $7.39 \mu\text{m}$  in the vertical direction.

### S3. Kernel Distribution Estimate (KDE)

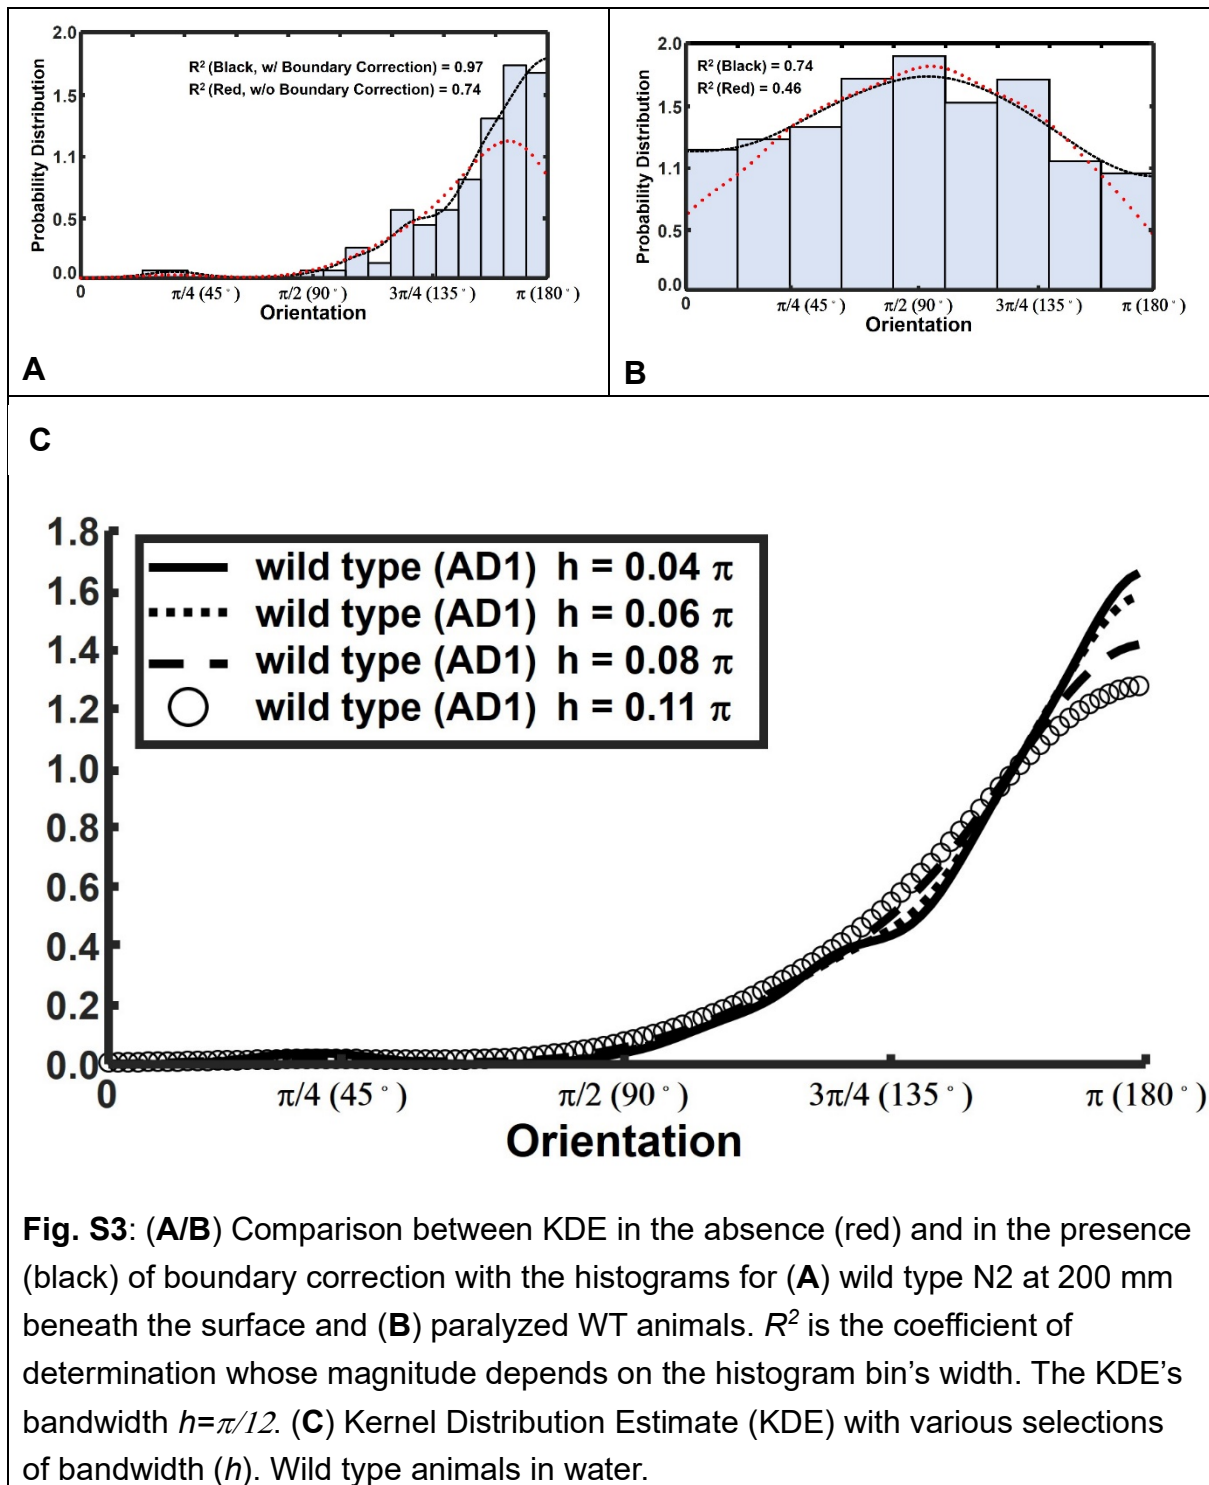

## S4. Reproducibility and Potential Artifacts

We repeated our experiments on different days and two different continents with similar results. **Fig. S4** depicts the orientation Kernel Distribution Estimate (KDE) at two different days (left) and two different continents (right) showing similar results.

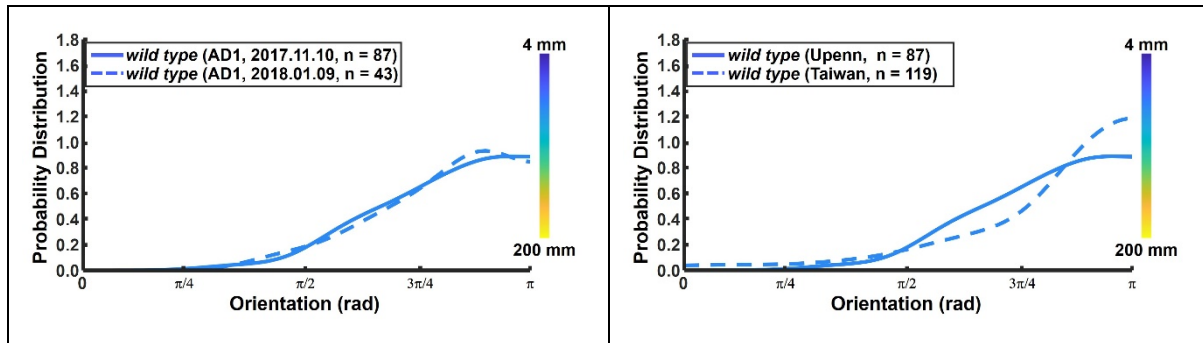

**Fig. S4:** Polar angle Kernel (probability density) Distribution Estimate (KDE) obtained in two experiments carried out 10 weeks apart (left) and in two different continents (USA and Taiwan).

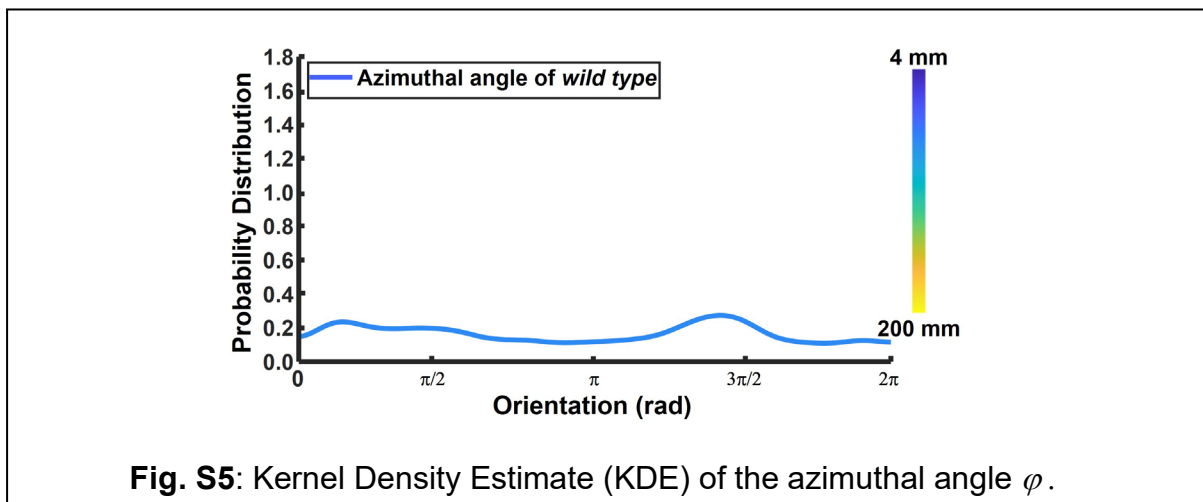

**Fig. S5:** Kernel Density Estimate (KDE) of the azimuthal angle  $\varphi$ .

To test whether our data may have been biased by convective currents in our experimental apparatus, we examined the Kernel Density Estimate (KDE) of the azimuthal angle  $\varphi$  (**Fig. S5**). Our data shows that worms descended with a nearly uniformly distributed azimuthal angle.

## S5. Cuvette material does not affect worms' behavior.

We have carried out most of our experiments with polystyrene cuvettes. On the time scale of our experiments, it is unlikely that the polystyrene would release enough volatile compounds, if any, to affect nematodes' behavior. However, out of the abundance of caution, we repeated our experiments monitoring wild type animals' descent angle in glass tubes (**Fig. S6**). The animals in glass tubes behaved like animals in polystyrene cuvettes.

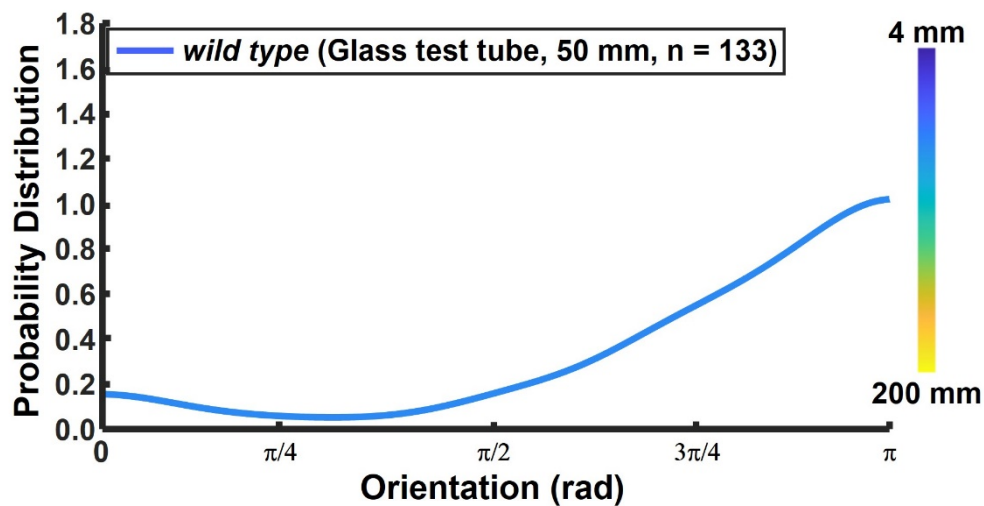

**Fig. S6:** Kernel Distribution Estimate (KDE) of the orientation angle ( $\theta$ ) at 5 cm beneath the liquid surface of wild type (N2) animals settling in a glass tube. N=133.

## S6. Von Mises - Fisher probability distribution function

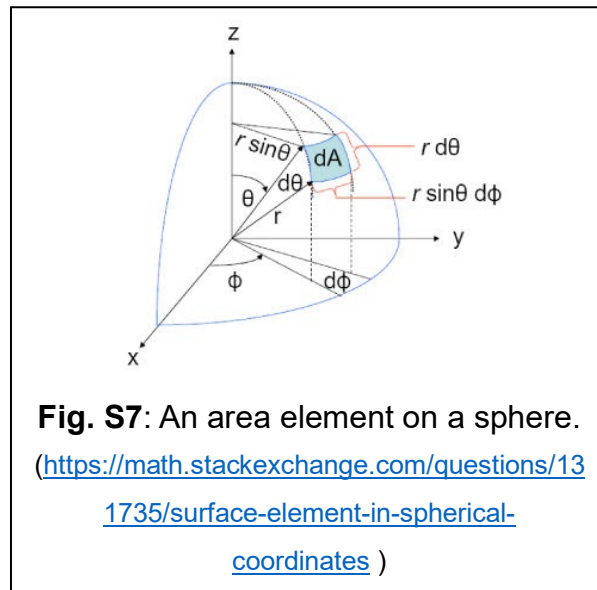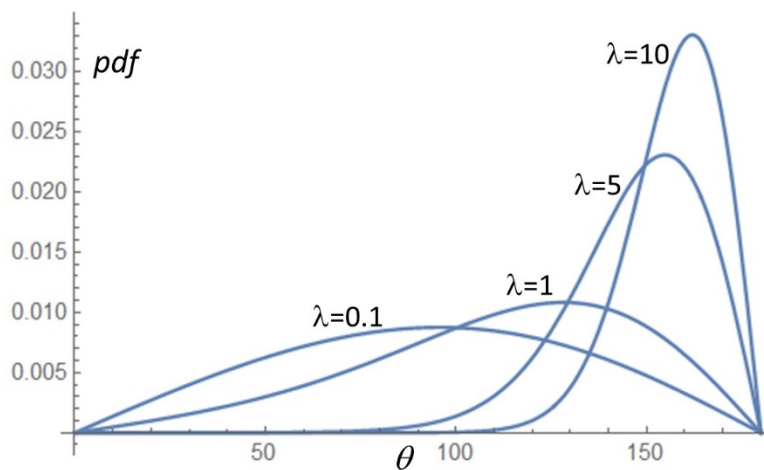

**Fig. S8:** Von Mises - Fisher probability distribution function(pdf) for various values of the concentration factor.  $\lambda = 0.1, 1, 5,$  and  $10$ .



**Fig. S9** depicts the cumulative distribution function (*cdf*) as a function of  $\theta$  when  $\lambda=0.1, 1, 5,$  and  $10$ .

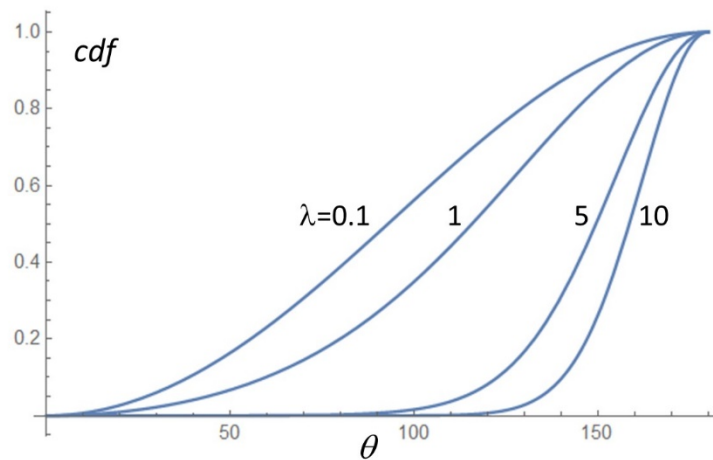

**Fig. S9:** Von Mises - Fisher cumulative distribution function (*cdf*) for various values of the concentration factor  $\lambda = 0.1, 1, 5,$  and  $10$ .

### S7. Kernel Distribution Estimate of well-fed wild-type animals at various depths beneath the liquid surface

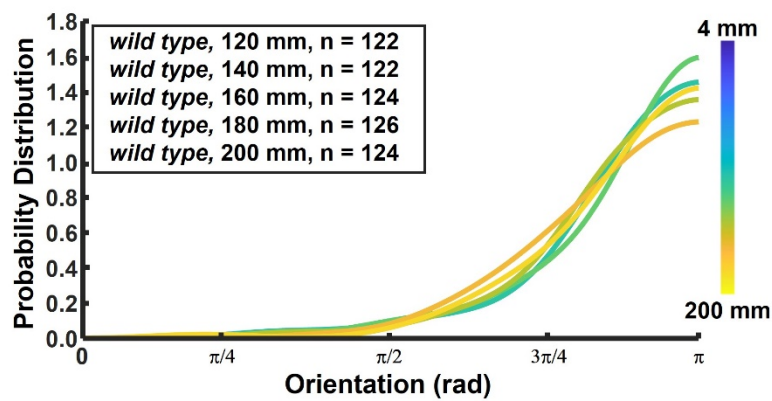

**Fig. S10: Wild-type worms retain their orientation after a certain residence time.** Kernel-density estimate of wild-type swimmers' orientation angle ( $\theta$ ) at positions 120, 140, 160, 180, and 200 mm beneath the liquid surface.

## S8. Motion-impaired animals do not gravitax

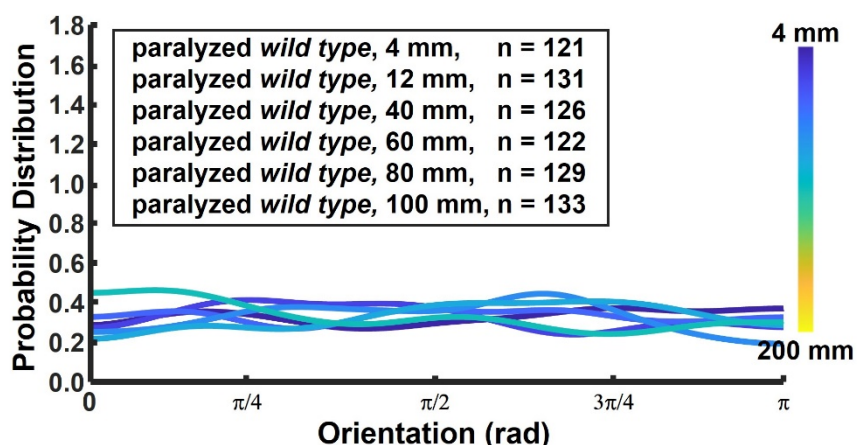

**Fig. S11: Paralyzed WT worms retain random distribution of their orientation as they settle in solution.** Kernel (probability) Density Estimate (KDE) of heat-shock paralyzed WT animals at depths ranging from 4 mm to 100 mm beneath the liquid surface. Similar results were obtained at the depth of 200 mm (not shown). The bandwidth of the KDE smoothing window is 15. This figure augments the data presented in the main text (**Fig. 3** for longer residence times. **Fig. 3** and this figure demonstrate that orientational KDE of paralyzed WT animals does not vary with depth and residence time.

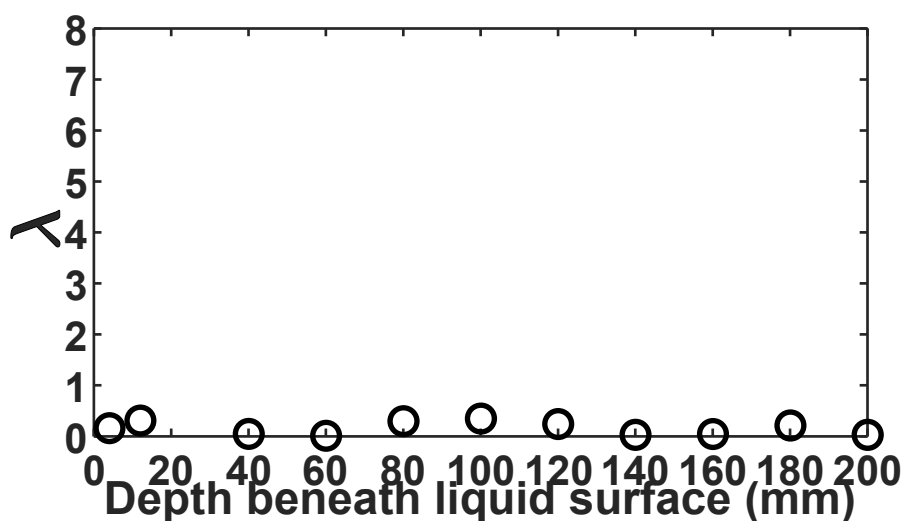

**Fig. S12: Paralyzed (heat-shocked) WT animals: concentration parameter  $\lambda$  as a function of depth (residence time).**  $\lambda$  remains nearly zero, independent of depth (and hence independent of residence time in solution), indicating that the animal's orientation is randomly distributed.

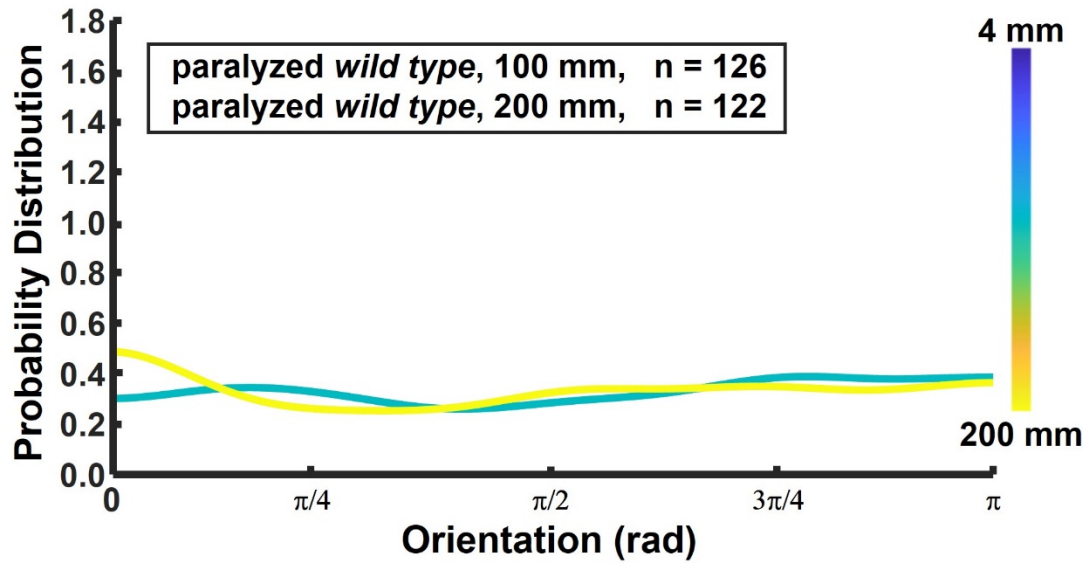

Fig. S13: Chemically (sodium azide) paralyzed WT worms retain random distribution of their orientation as they settle in solution. Kernel (probability) Density Estimate (KDE) of chemically - paralyzed WT animals at 100 mm (N=126) and 200 mm (N=122) beneath the liquid surface. The bandwidth of the KDE smoothing window is 15.

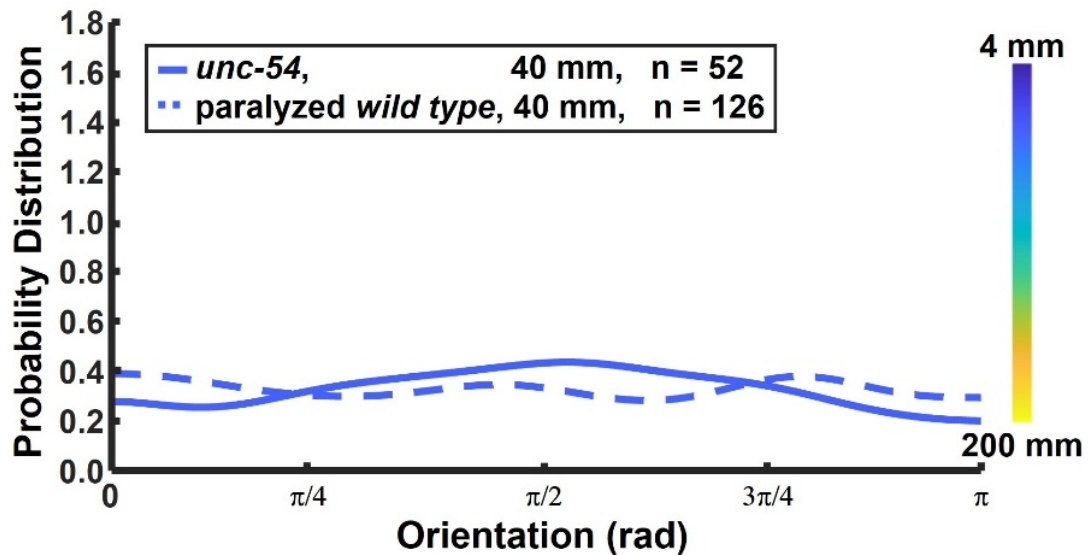

Fig. S14: KDE of *unc-54* is compared with that of paralyzed (heat-shocked) WT at depth  $d = 40$  mm beneath the water surface. The two KDEs are similar and consistent with a random distribution in the orientation angle.

**S9. Starved WT and motion-impaired animals (*unc-29*) align with the direction of gravity at a lower rate than well-nourished WT animals.**

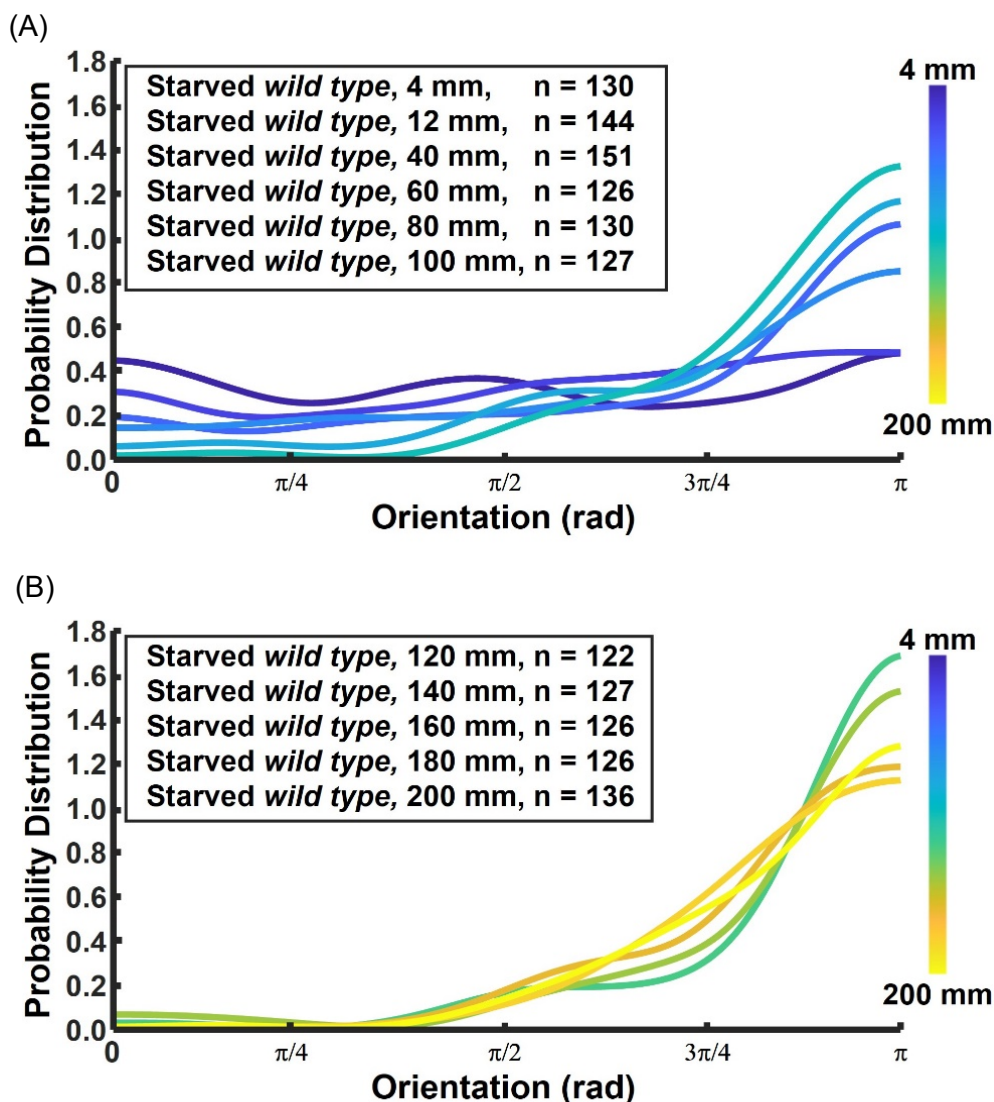

**Fig. S15: Starved (>1 h after last feeding) WT animals align with the direction of the gravity vector. (A) Kernel (probability) density estimate (KDE) of starved WT animals at depths ranging from 4 to 100 mm beneath the liquid surface. The bandwidth of the KDE smoothing window is  $\pi/12$ . (B) Kernel (probability) density estimate (KDE) of starved WT animals at depths ranging from 120 to 200 mm beneath the liquid surface. The bandwidth of the KDE smoothing window is  $\pi/12$ .**

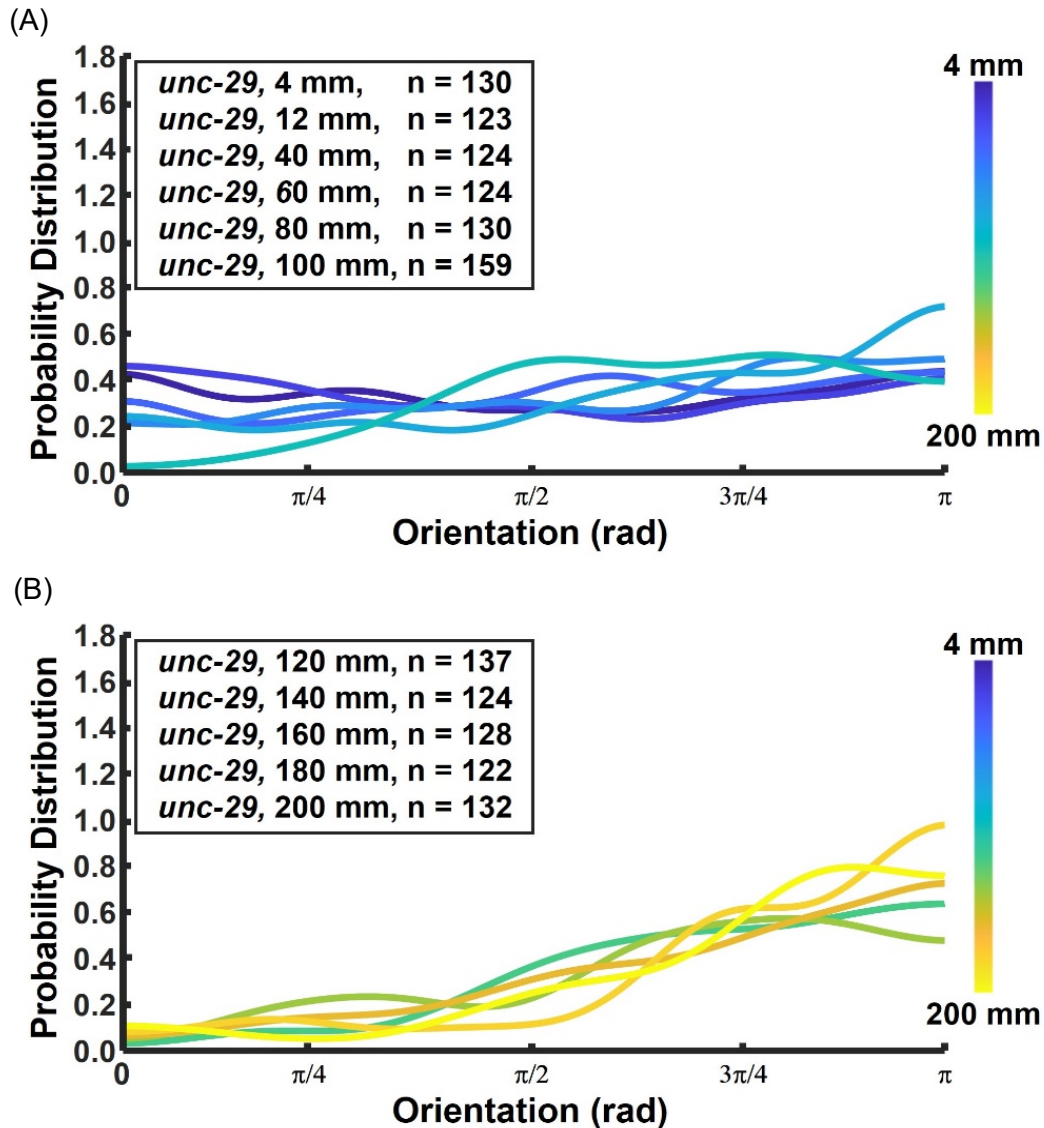

**Fig. S16: Animals defective in neuromuscular junction function (*unc-29*) align slowly with the direction of the gravity vector.** (A) Kernel (probability) Density Estimate (KDE) *unc-29* mutants at depths ranging from 4 to 100 mm beneath the liquid surface. The bandwidth of the KDE smoothing window is  $\pi/12$ . (B) Kernel Density Estimate (KDE) *unc-29* mutants at depths ranging from 120 to 200 mm beneath the liquid surface. The bandwidth of the KDE smoothing window is  $\pi/12$ .

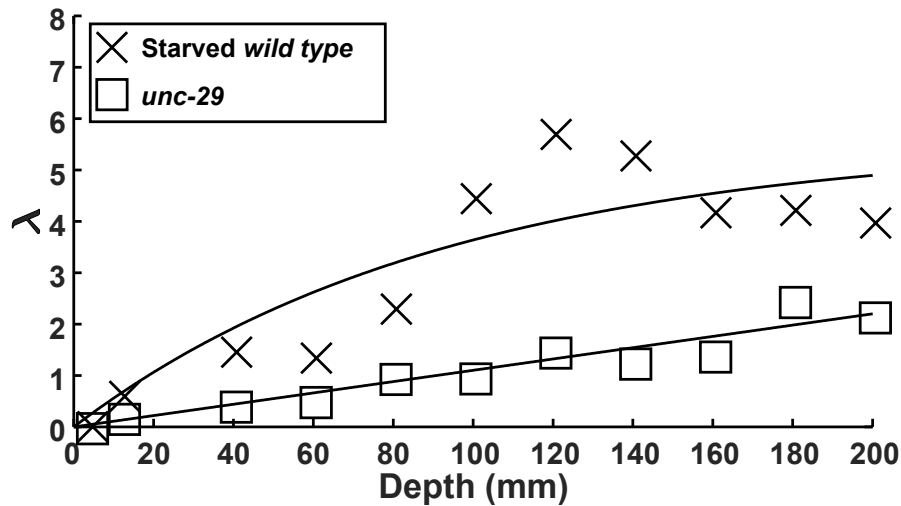

**Fig. S17: The concentration factor of starved WT animals and *unc-29* mutants increases as their submersion depth (residence time) increases.** The increase in the concentration factor indicates alignment with the direction of the gravity vector. The solid lines are best fit curves (equation 3) with  $\lambda_{\infty} \sim 5.56$  and  $\beta \sim 0.011 \text{ mm}^{-1}$  (starved WT) and  $\lambda_{\infty} \sim 12.00$  and  $\beta \sim 0.001 \text{ mm}^{-1}$  (*unc-29*).

### S10. *C. elegans* mutant for the genes *osm-6* or *che-2* do not gravitax

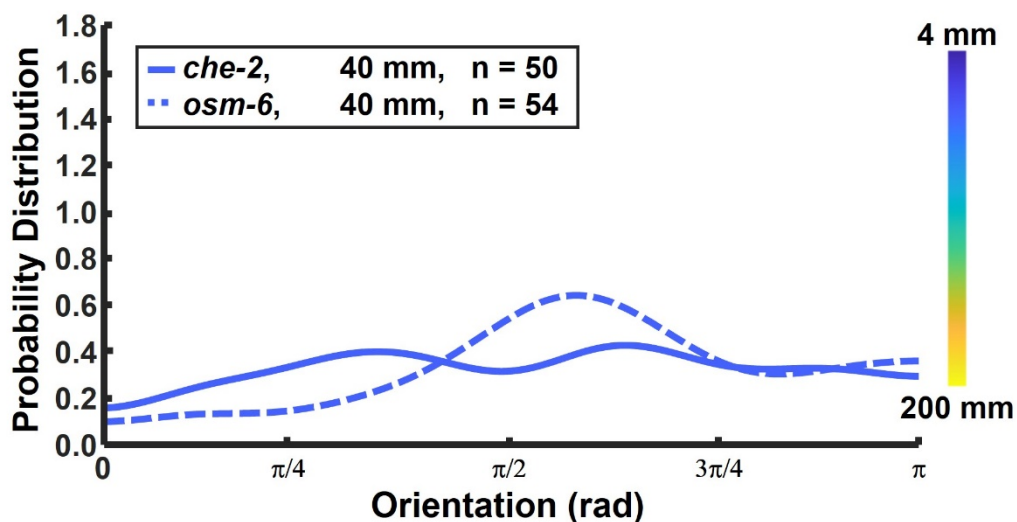

**Fig. S18: Sensory mutants *che-2* and *osm-6* show defects in downward orientation.** Kernel-density estimate plot of angle of descent of sensory mutants at 40 mm beneath liquid surface. The distributions of angles of descent of *che-2* and *osm-6* mutants are all broader than that of wild-type animals and approximate random distribution. Compared to WT distribution,  $p \leq 0.0001$  (Mann Whitney Test).  $N_{che-2}=50$ , and  $N_{osm-6}=54$ . In depicting the KDE curves, we used Matlab™ default values.

**S11. *mec-3* and *mec-4* mutants show essentially normal gravitaxis while *che-2* and *osm-6* are defective in gravitaxis.**

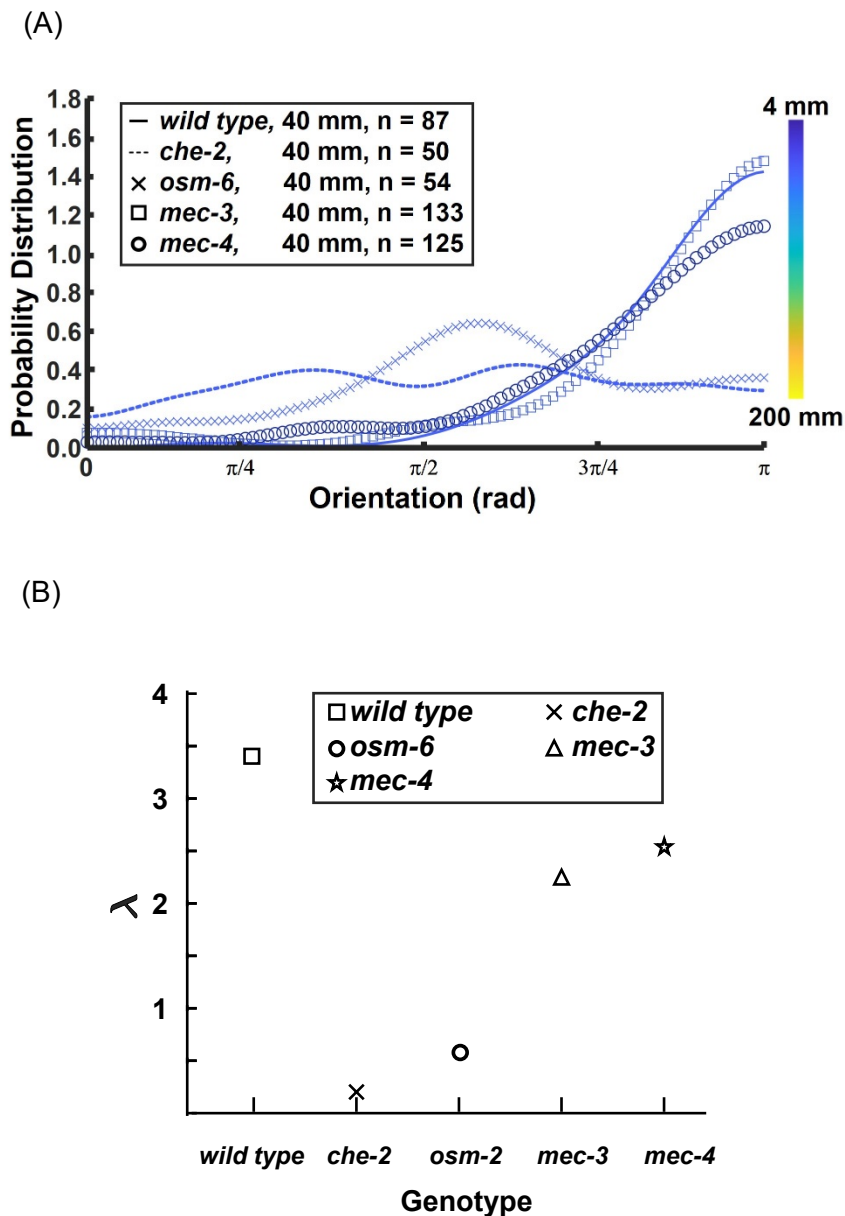

**Fig. S19: Ciliated sensory neuron mutants show defects in downward orientation.** (A) Kernel Density Estimate (KDE) plot of angle of descent of sensory mutants and of wild-type controls and (B) the concentration factor of the various strains. The distributions of angles of descent of *che-2* and *osm-6* mutants are all broader than that of wild-type animals and show an average close to 90°. The concentration factor and the average angles of descent of the mechanosensory mutants *mec-3* and *mec-4* are lower but not significantly different from that of wild-type animals.  $N_{WT}=87$ ,  $N_{che-2}=50$ ,  $N_{osm-6}=54$ ,  $N_{mec-3}=133$ ,  $N_{mec-4}=125$ .  $d=40$  mm. In depicting the KDE curves, we used Matlab™ default values.

S12. Dopamine-deficient worms are deficient in gravitaxis.

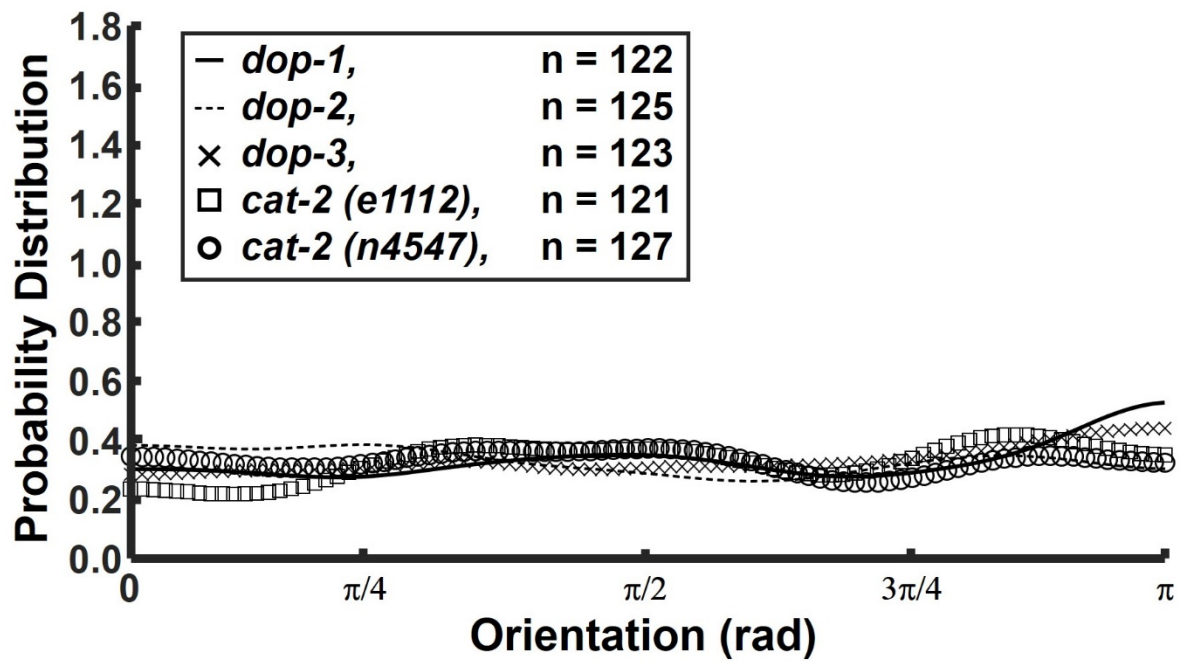

Fig. S20: Dopamine deficient mutants (*cat-2*, *dop-1*, *dop-2*, and *dop-3*) are deficient in gravitaxis. Kernel Density Estimate (KDE) plots of the angle of descent of the dopamine deficient mutants: *cat-2* (N=121), *dop-1* (N=122), *dop-2* (N=125), and *dop-3* (N=123) at 200 mm beneath the liquid surface.



### S13. Pharmacological dopamine rescues gravitaxis defect in *cat-2*

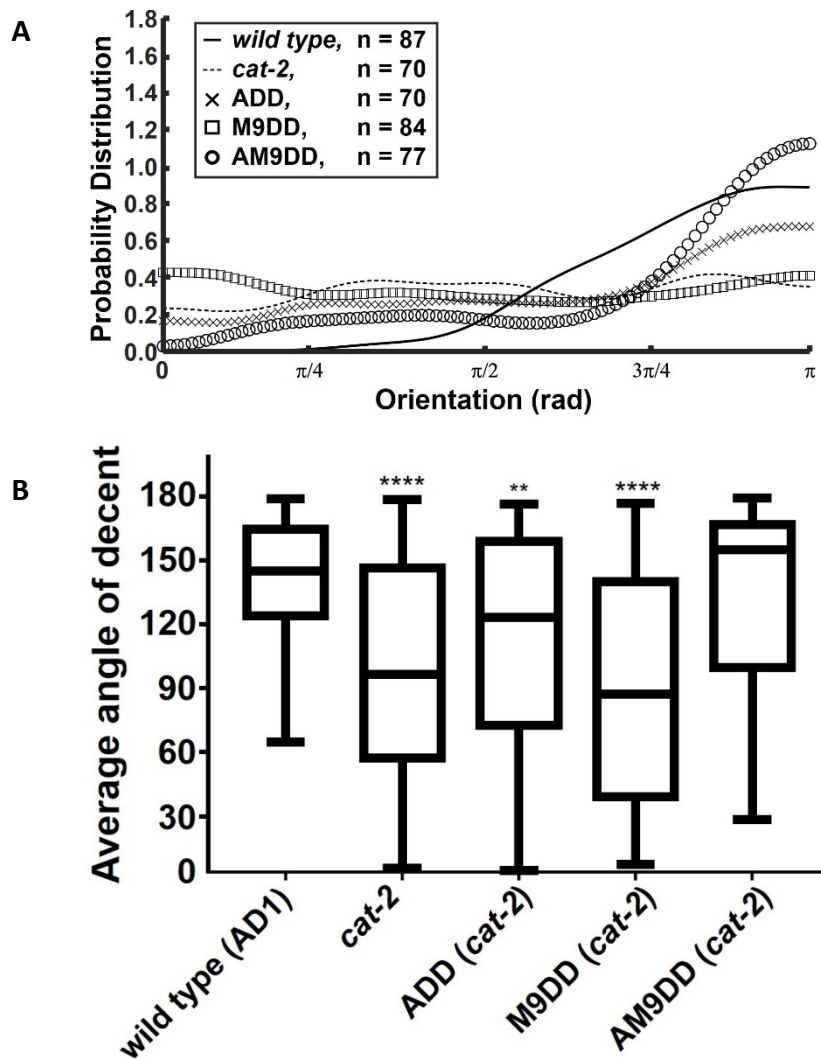

**Fig. S21: Dopamine rescues the *cat-2* gravitaxis defect.** (A) and (B) show the Kernel-density plot and box plot, respectively. The distributions of angles of descent of *cat-2* untreated mutants, and *cat-2* mutants treated with dopamine in M9 solution are broader than that of wild-type animals and show an average inclination angle close to 90°. The distribution of angles of descent of *cat-2* mutants treated with dopamine both in agar and in M9 are not significantly different from that of wild-type animals ( $p = 0.86$ ), whereas the distribution of angles of descent of *cat-2* mutants treated with dopamine only in the agar was close to but still significantly different from that of wild-type animals ( $p \leq 0.01$  \*\*). The distribution of angles of descent of *cat-2* mutants treated with dopamine only in the M9 was not different from untreated *cat-2* mutants and significantly different from that of wild-type animals ( $p \leq 0.0001$  \*\*\*\*). Mann Whitney test,  $N_{cat-2}=70$ ,  $N_{ADD}=70$ ,  $N_{M9DD}=84$ ,  $N_{AM9DD}=77$ . In depicting the KDE curves, we used Matlab™ default values.

**S14. Comparison of the swimming gaits of WT, *osm-6*, *cat-2*, and pharmaceutically treated *cat-2***

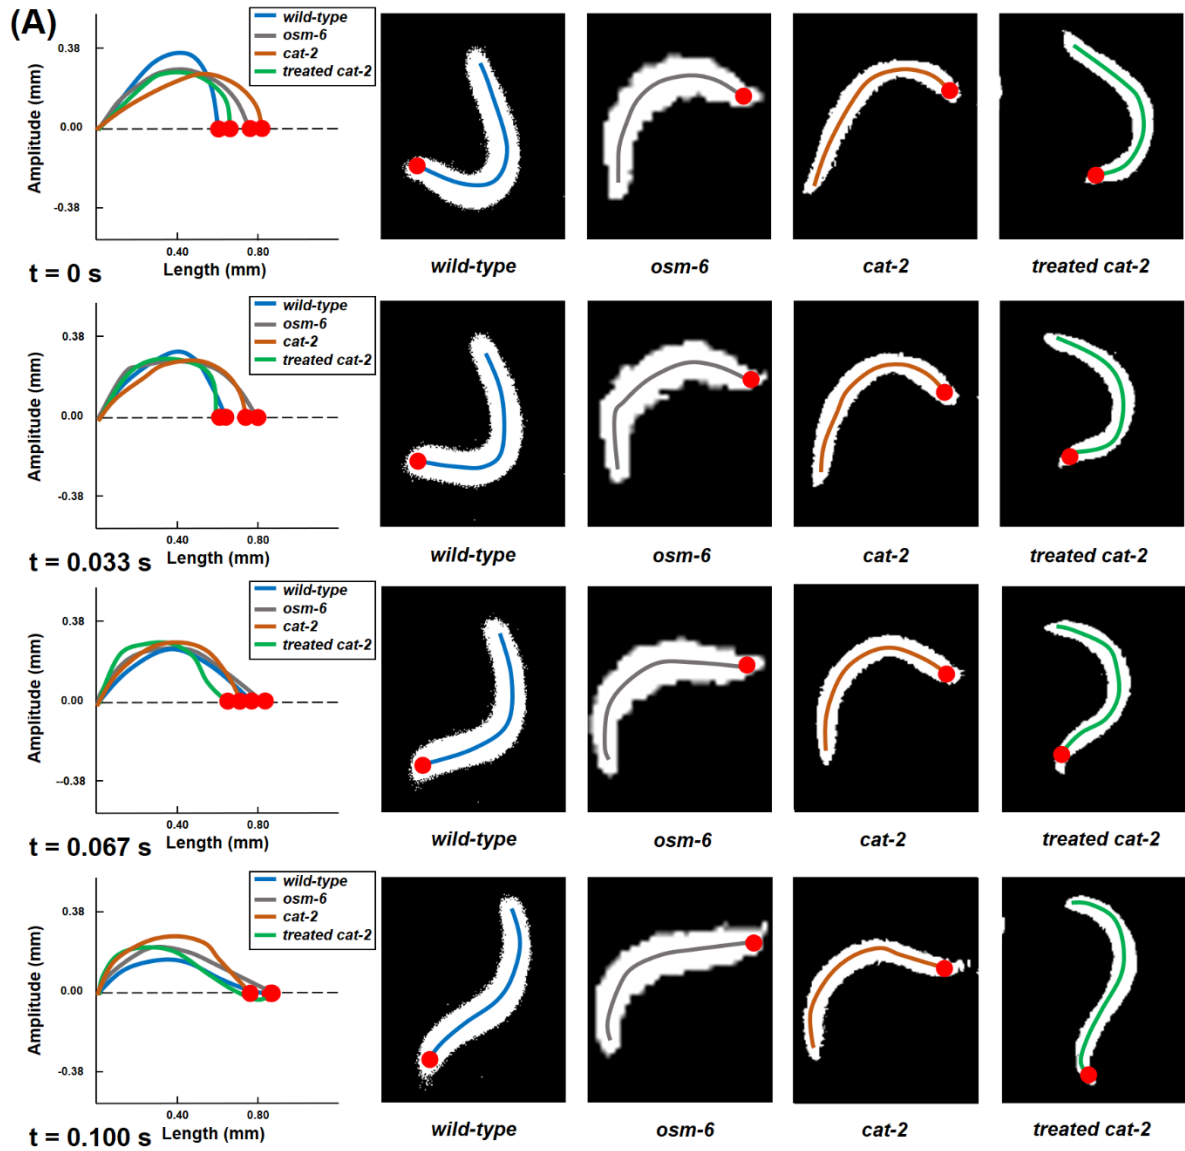

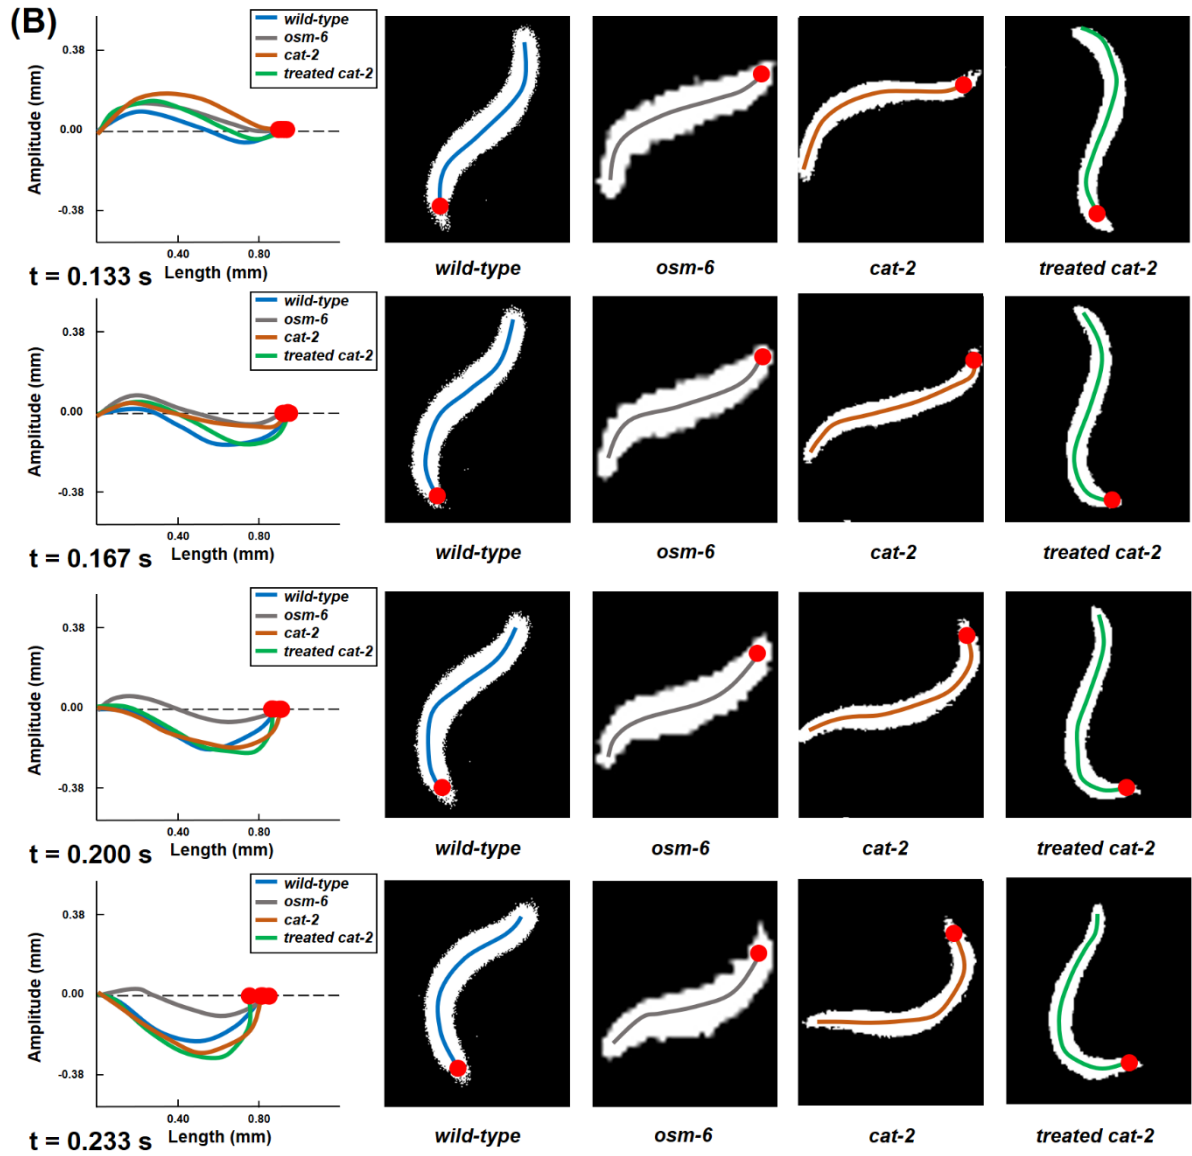

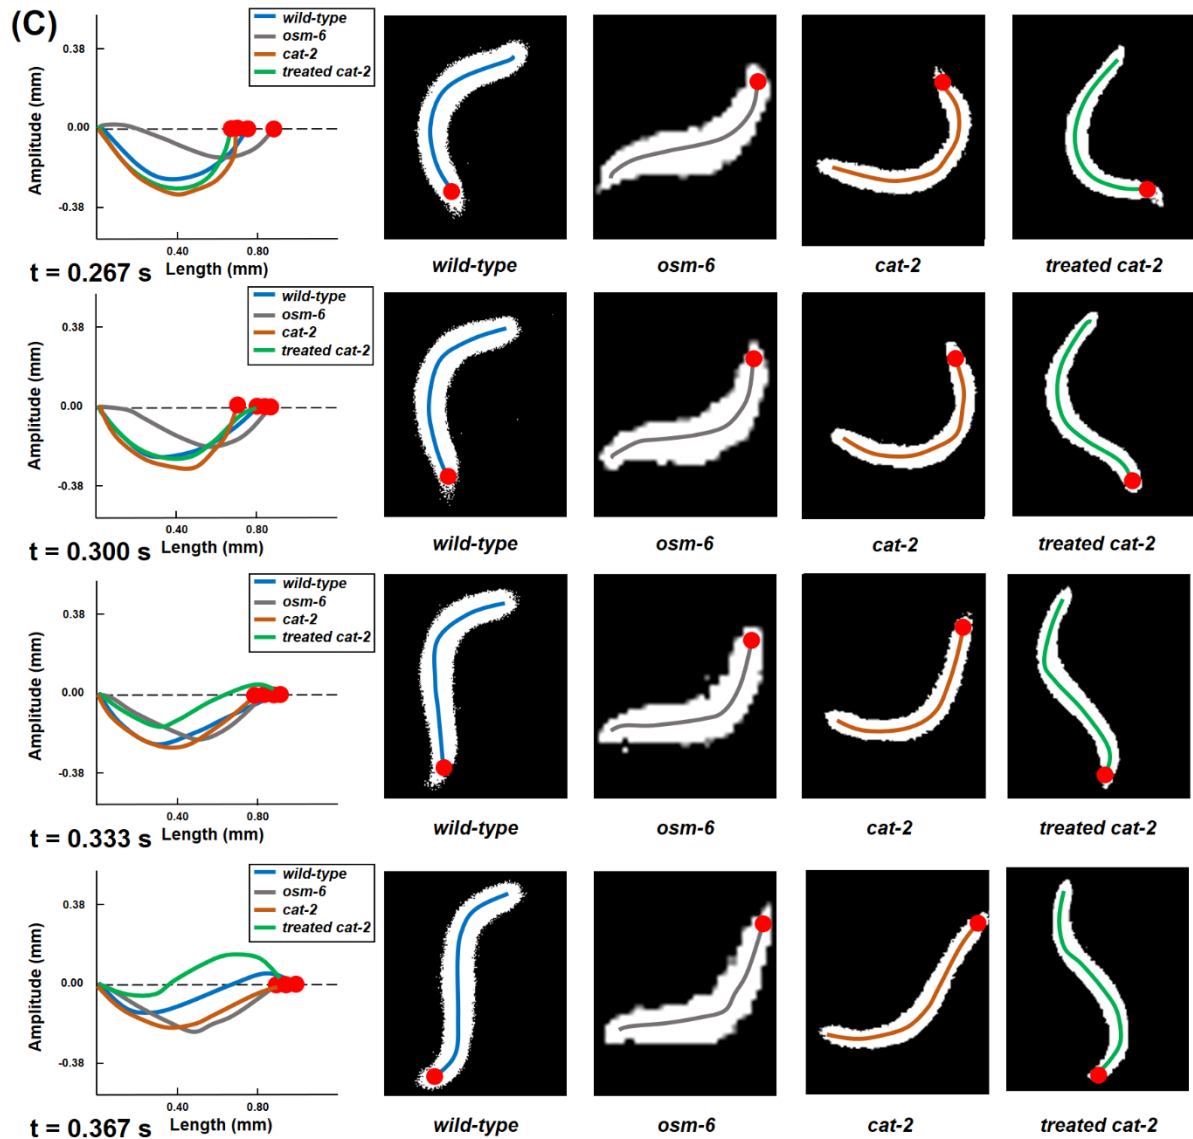

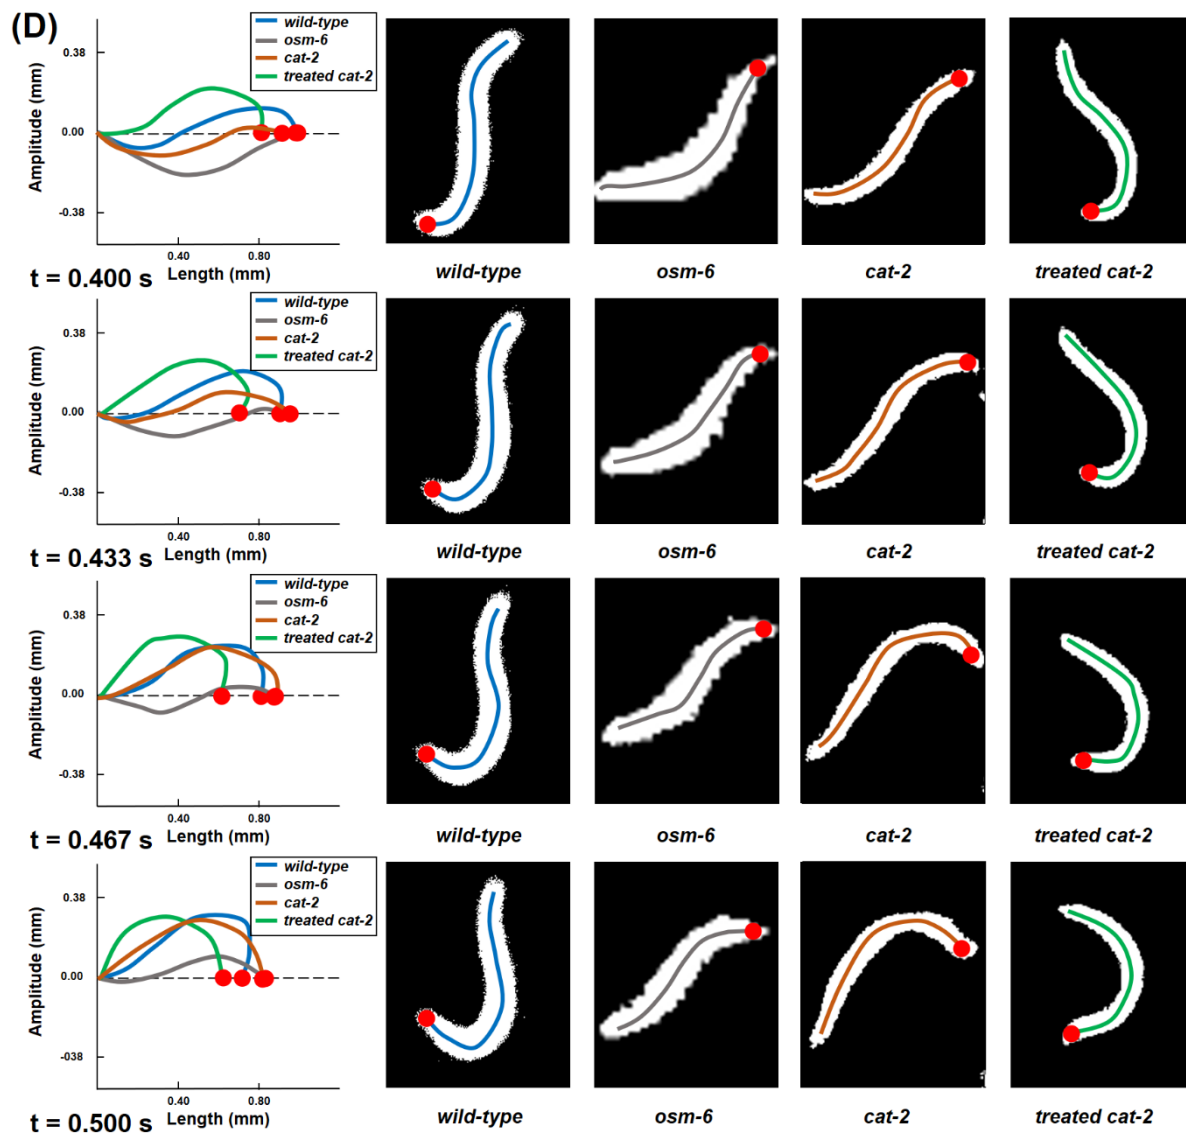

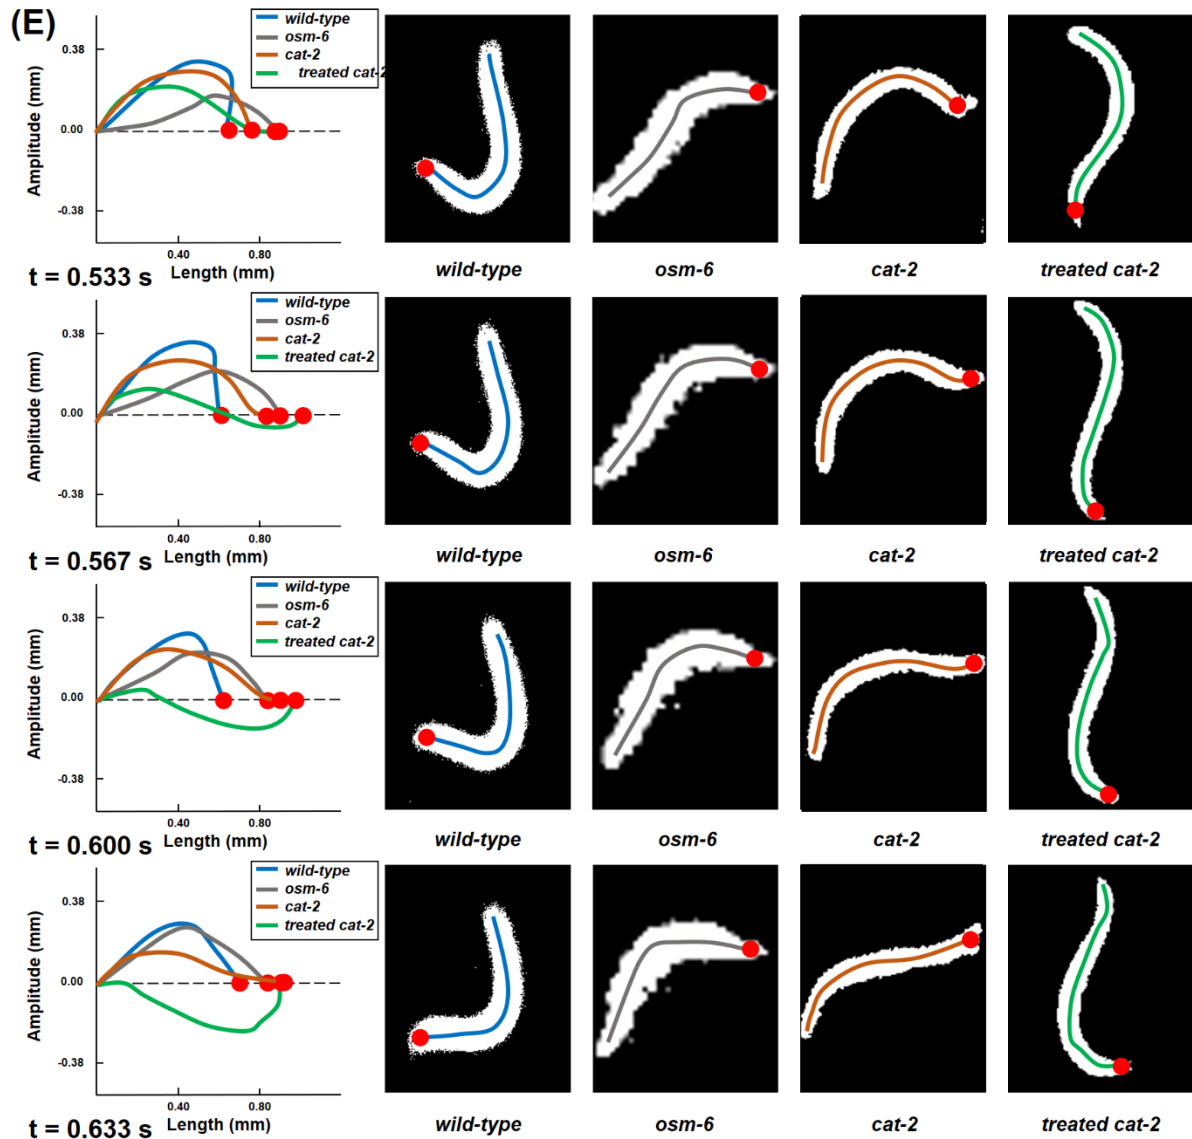

**Fig. S22:** The body shapes of WT, *osm-6*, *cat-2*, and pharmaceutical treated *cat-2* as functions of time  $t$ , where  $0 < t < 0.6$  s. Left column: the instantaneous body centroid depicted as a function of position along the chord that connects the animal's head and tail. Right column: raw images.

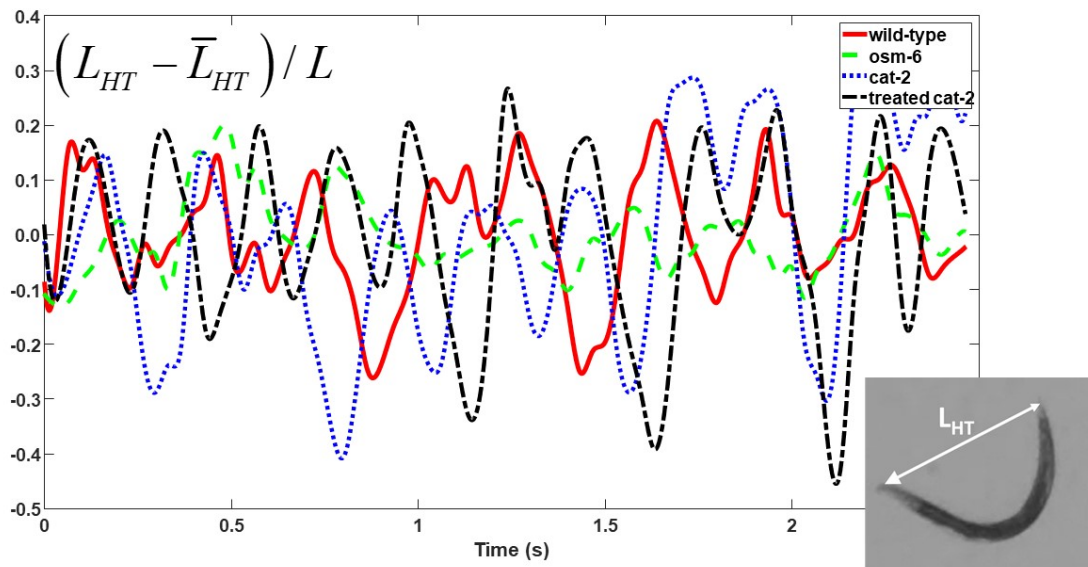

**Fig. S23:**  $(L_{HT} - \bar{L}_{HT}) / L$  of WT, *osm-6*, *cat-2*, and pharmaceutical treated *cat-2* as functions of time.  $L_{HT}$  is the distance between head and tail (defined in the inset).  $L$  is the animal's body length.  $\bar{L}_{HT}$  is the average distance between head and tail.

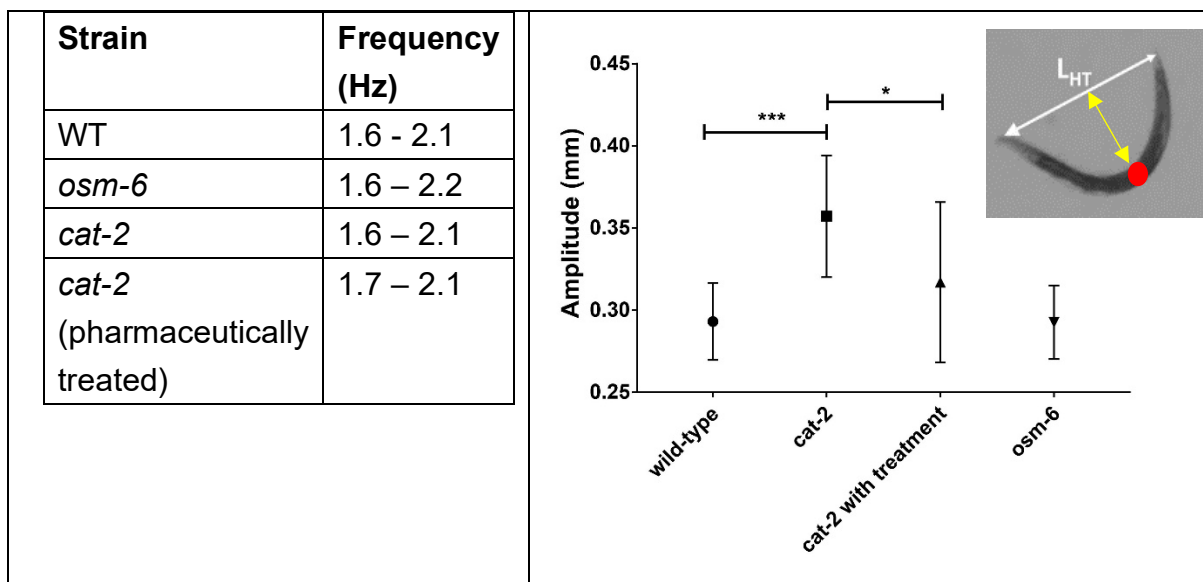

**Fig. S24:** Body bending frequency (left) and amplitude (right) of WT, *osm-6*, *cat-2*, and pharmaceutical treated *cat-2* (N=30). The amplitude is defined by the largest distance between the animal's body and the chord connecting head to tail (yellow arrow in the inset) ( $p \leq 0.05$  \*,  $p \leq 0.001$  \*\*\*). The frequency is half the frequency determined by Fast Fourier Transform (FFT) of the time series of **Fig. S23**.

We collected images of settling WT, *osm-6*, *cat-2*, and pharmaceutical treated *cat-2* as functions of time while the animals were within the field of view of the camera (**Fig. S24**, right). These images were processed to identify the central line of each animal. The left column (**Fig. S22**) depicts the “body shape” as a function of position along the chord that connects head and tail. We inferred the animals’ normalized body deformation  $(L_{HT} - \bar{L}_{HT})/L$  as functions of time (**Fig. S23**) and the animals’ body bending frequency (full cycle) and amplitude (**Fig. S24**).  $L_{HT}$  is the distance between head and tail (defined in the inset in **Fig. S23**).  $L$  is the animal’s body length.  $\bar{L}_{HT}$  is the average distance between head and tail. The frequency of  $(L_{HT} - \bar{L}_{HT})/L$  is twice the beating frequency. Although the animals’ gaits are not identical, differences in the gaits are relatively small and unlikely to explain why certain animals gravitax while others do not.



**S15. Well-fed adult worms of the AB1 Adelaide strain align their direction of swimming with the direction of the gravity vector.**

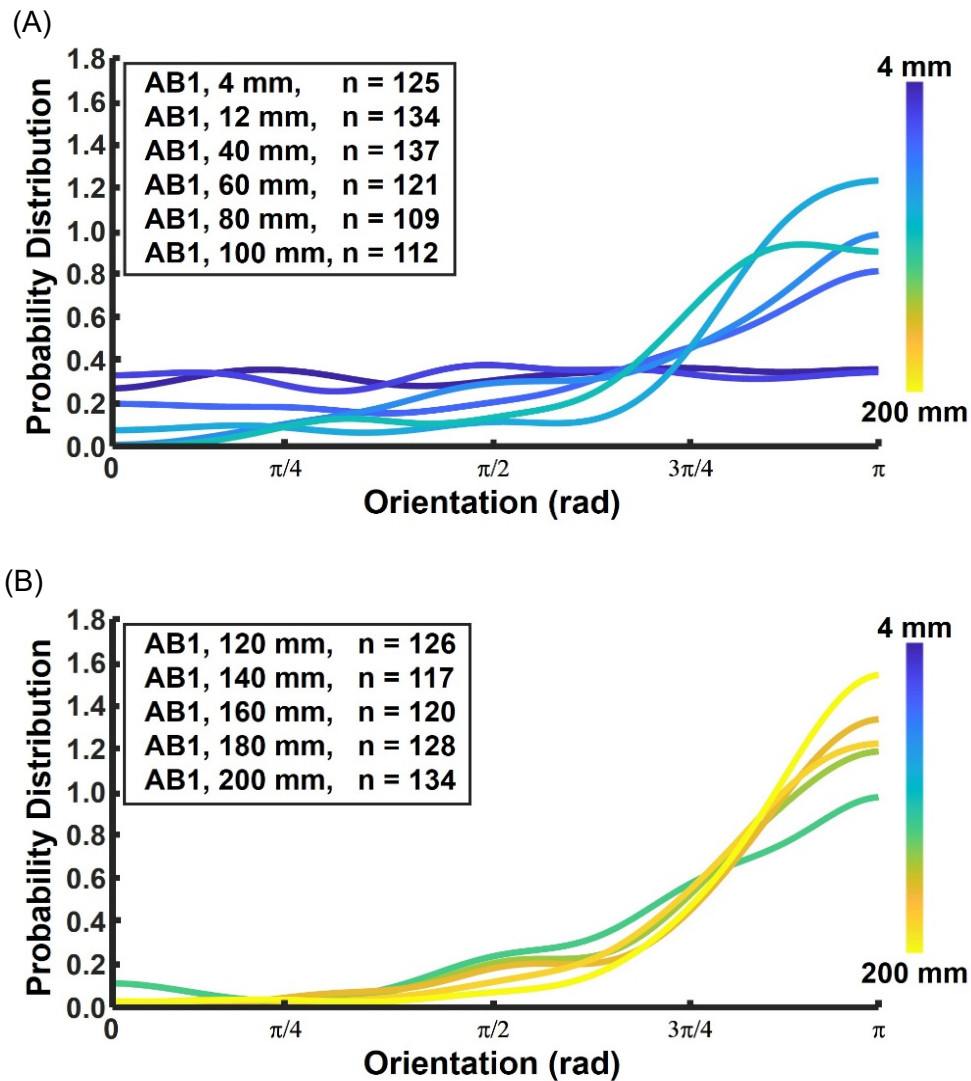

**Fig. S25: Well-fed adult worms of the AB1 Adelaide strain align their direction of swimming with the direction of the gravity vector. (A)** Kernel Density Estimate (KDE) AB1 mutants at depths ranging from 4 to 100 mm beneath the liquid surface. The bandwidth of the KDE smoothing window is  $\pi/12$ . **(B)** Kernel (probability) Density Estimate AB1 mutants at depths ranging from 120 to 200 mm beneath the liquid surface. The bandwidth of the KDE smoothing window is  $\pi/12$ .

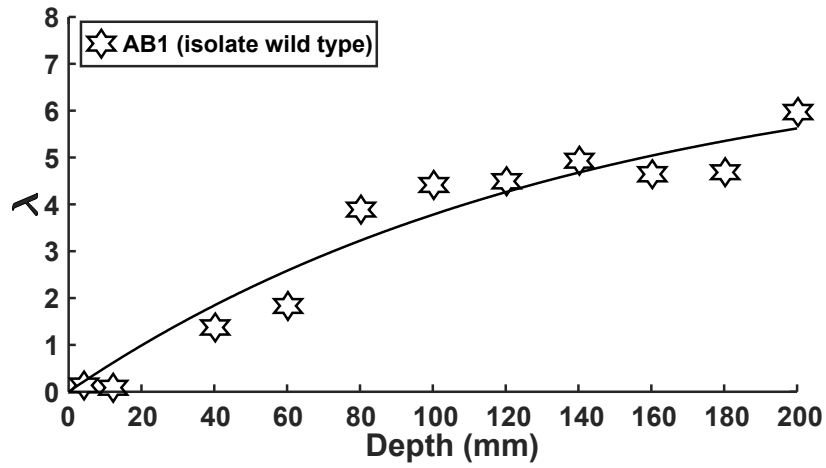

**Fig. S26: The concentration factor of well-fed AB1 animals increases as their submersion depth (residence time) increases.** The increase in the concentration factor indicates alignment with the direction of the gravity vector. The solid line is a best fit curve (equation 3) with  $\lambda_{\infty} \sim 7.37$  and  $\beta \sim 0.007 \text{ mm}^{-1}$ .

**S16: *C. elegans* on agar does not gravitax**

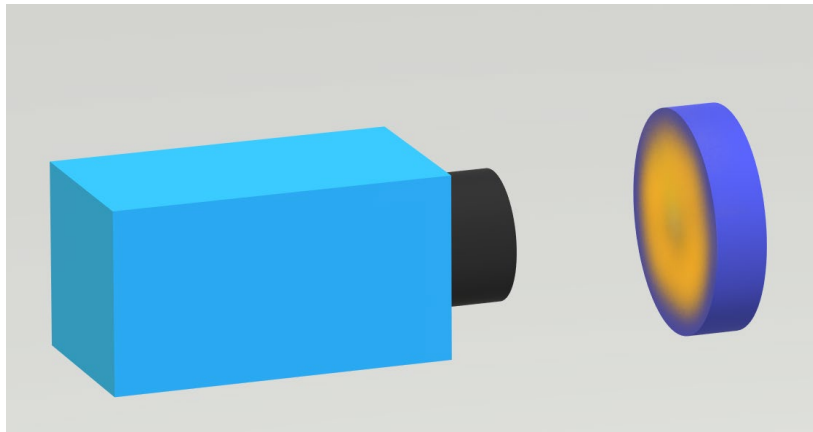

**Fig. S27:** The experimental set-up for monitoring the orientation of *C. elegans* on a 35 mm diameter, vertical agar plate. The camera focuses on the center of the agar plate. The width and height of the imaged area are respectively 10.4mm and 8.2mm. In the well-fed experiments, the agar was seeded with bacteria.

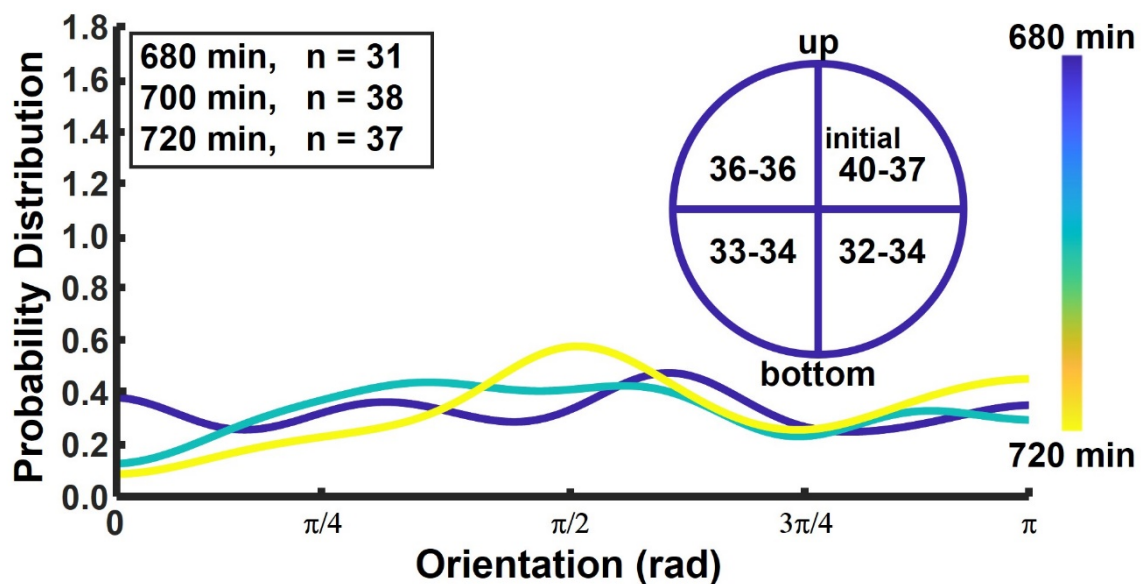

**Fig. S28: Well-fed WT animals on vertical agar plate do not show gravitaxis.** The Kernel-density plot (KDE) of WT orientation after 680, 700, and 720 minutes does not differ significantly from similar KDE plots at earlier times. The inset counts the number of animals in each quadrant at the beginning (time zero) and the end (after 12 hours) of the experiment.

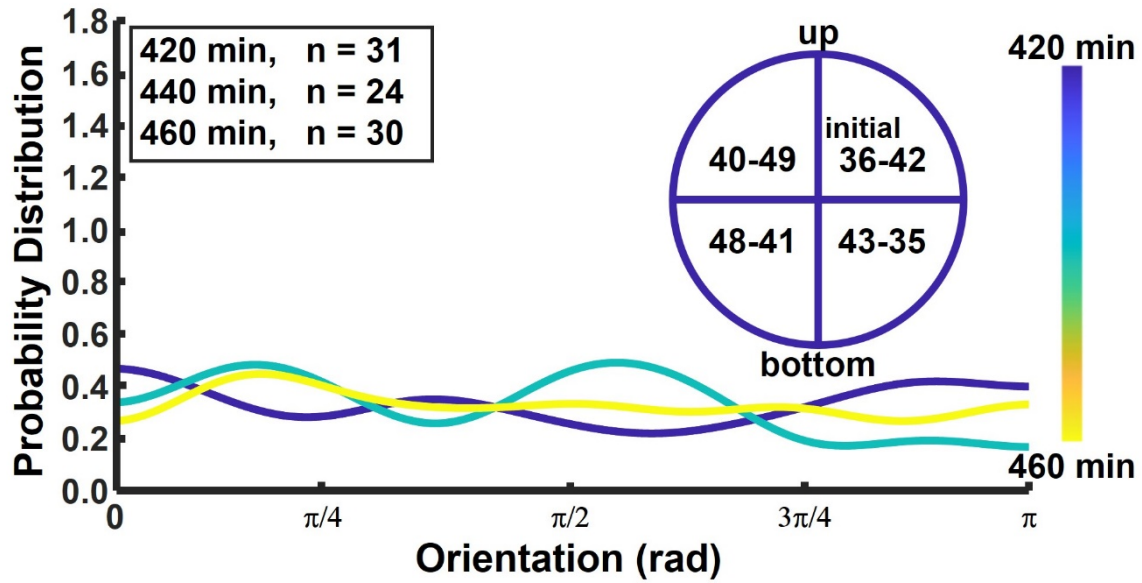

**Fig. S29: Well-fed *mec-3* animals on vertical agar plate do not show gravitaxis.** The Kernel-density plot (KDE) of *mec-3* orientation after 420, 440, and 480 minutes does not differ significantly from similar KDE plots at earlier times. The inset counts the number of animals in each quadrant at the beginning (time zero) and the end (after 12 hours) of the experiment.

### S17. Top heavy cylinders settle broad side.

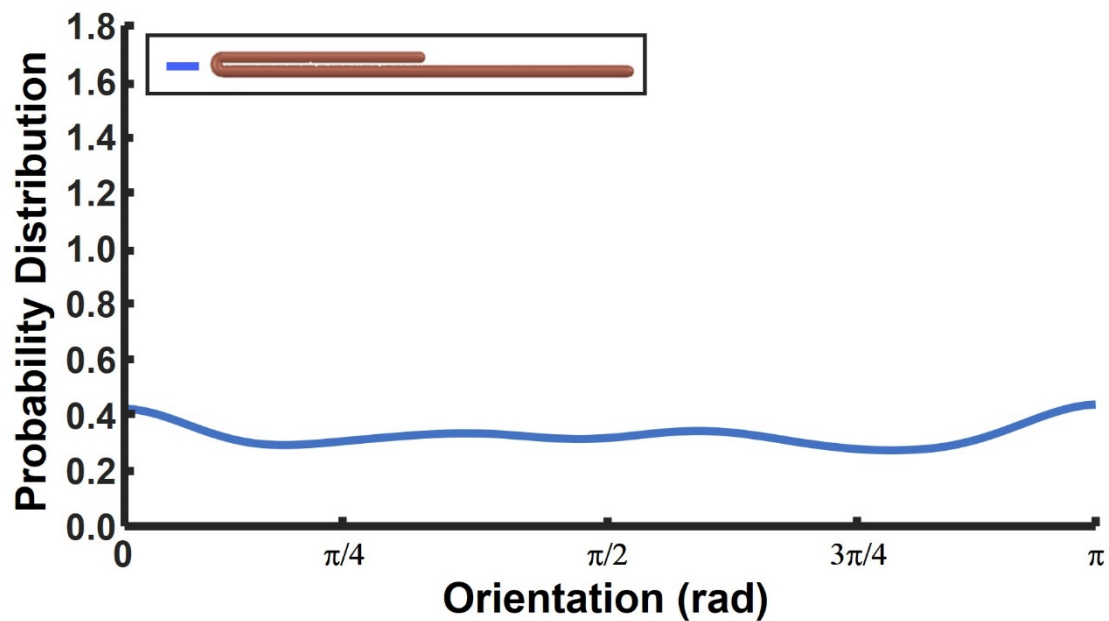

**Fig. S30:** Kernel (probability) Density Estimate (KDE) of the inclination angle  $\theta$  of a settling top heavy metal (copper) wire of 1 mm length and 100  $\mu\text{m}$  diameter folded upon itself.

To demonstrate, in principle, that non-uniform mass distribution does not necessarily cause worms to rotate and align with the direction of gravity, we carried out a simple experiment wherein we monitored the orientation of a folded copper wire settling in aqueous solution. Although the wire is heavier on one side than the other, it settled *broadside* and did not rotate to align with the direction of gravity. The metal wire is heavier and settles at higher speed than the nematode, but the mass imbalance and the torque acting to bring the wire to a vertical posture are also much greater than for the nematode.

**Table S1: Summary of Our Experiments**

| <b>Strain and Condition*</b>                  | <b>Characteristics</b>                                       | <b>Gravitaxis?</b> |
|-----------------------------------------------|--------------------------------------------------------------|--------------------|
| <b>Worms suspended in an aqueous solution</b> |                                                              |                    |
| N2                                            | Wild type isolated in the Northern hemisphere                | YES**              |
| N2 without food                               | N2 starved                                                   | YES                |
| N2, heat-killed                               | Permanent paralysis                                          | NO                 |
| N2, sodium azide                              | Reversible paralysis                                         | NO                 |
| <i>unc-54(e190)</i>                           | Severely Impaired body movement                              | NO                 |
| <i>unc-29(e1072)</i>                          | Mildly impaired body movement                                | YES                |
| AB1                                           | Wild type isolated in the Southern Hemisphere                | YES                |
| <i>osm-6(p811)</i>                            | Globally disrupted sensory cilia                             | NO                 |
| <i>che-2(e1033)</i>                           | Globally disrupted sensory cilia                             | NO                 |
| <i>mec-3(e1338)</i>                           | Defective response to light and harsh touch                  | YES                |
| <i>mec-4(u253)</i>                            | Defective response to light touch                            | YES                |
| <i>cat-2(e1112)</i>                           | Defective dopamine biosynthesis                              | NO                 |
| <i>cat-2(n4547)</i>                           | Defective in dopamine biosynthesis                           | NO                 |
| <i>cat-2(e1112)</i> ,<br>dopamine             | <i>cat-2</i> mutants pharmacologically treated with dopamine | YES                |
| <i>dop-1(vs101)</i>                           | Defective dopamine receptor                                  | NO                 |
| <i>dop-2(vs105)</i>                           | Defective dopamine receptor                                  | NO                 |
| <i>dop-3(vs106)</i>                           | Defective dopamine receptor                                  | NO                 |
| <b>Worms on an agar surface</b>               |                                                              |                    |
| N2                                            | Wild type                                                    | NO                 |
| N2, without food                              | N2 starved                                                   | NO                 |
| <i>mec-3(e1338)</i>                           | Defective response to light and harsh touch                  | NO                 |
| <i>mec-3(e1338)</i><br>without food           | Defective response to light and harsh touch                  | NO                 |

**Table S1: Gravitaxis as a function of strain and condition.**

\*All worms were cultivated with ample ad libitum food (i.e., well-fed) unless indicated otherwise.

\*\*  $\lambda > 1$

**Table S2: Percent of worms that were censored**

| <b>Strain</b>                                     | <b>Censored Inactive worms<br/>(Presumed dead)</b> |
|---------------------------------------------------|----------------------------------------------------|
| <b>Worms suspended in an aqueous<br/>solution</b> | <b>Percentage</b>                                  |
| N2                                                | ~ 3 %                                              |
| N2 without food                                   | ~ 4 %                                              |
| <i>unc-29(e1072)</i>                              | ~ 17 %                                             |
| AB1                                               | ~ 3 %                                              |
| <i>osm-6(p811)</i>                                | ~ 5 %                                              |
| <i>che-2(e1033)</i>                               | ~ 4 %                                              |
| <i>mec-3(e1338)</i>                               | ~ 7 %                                              |
| <i>mec-4(u253)</i>                                | ~ 5 %                                              |
| <i>cat-2(e1112)</i>                               | ~ 3 %                                              |
| <i>cat-2(n4547)</i>                               | ~ 6 %                                              |
| <i>cat-2(e1112)</i> , dopamine                    | ~ 4 %                                              |
| <i>dop-1(vs101)</i>                               | ~ 3 %                                              |
| <i>dop-2(vs105)</i>                               | ~ 8 %                                              |
| <i>dop-3(vs106)</i>                               | ~ 3 %                                              |

**Table S2:** Fraction of censored animals in experiments with motile animals as a function of strain. Non-moving animals were censored and not included in the data analysis.

**Table S3: Statistical Analysis**

We tested the likelihood of the null hypothesis  $H_0^{WT}$  that any of the distributions is like that of the wild type (N2) and the null hypothesis  $H_0^{Paralyzed}$  that any of the distributions is like that of the heat -paralyzed animals at approximately the same depth.

| <b>Strain and Condition*</b>    | <b>Gravitaxis?</b> | <b>Probability of <math>H_0^{WT}</math></b> | <b>Probability of <math>H_0^{Paralyzed}</math></b> |
|---------------------------------|--------------------|---------------------------------------------|----------------------------------------------------|
| N2                              | YES                | 1                                           | <0.001                                             |
| N2 without food                 | YES                | 0.15                                        | <0.001                                             |
| N2, heat-killed                 | NO                 | <0.001                                      | 1                                                  |
| N2, sodium azide*               | NO                 | <0.001                                      | 0.85                                               |
| <i>unc-54(e190)*</i>            | NO                 | <0.001                                      | 0.99                                               |
| <i>unc-29 (e1072)</i>           | YES                | <0.001                                      | <0.001                                             |
| AB1                             | YES                | 0.66                                        | <0.001                                             |
| <i>osm-6 (p811)*</i>            | NO                 | <0.001                                      | 0.02                                               |
| <i>che-2 (e1033)*</i>           | NO                 | <0.001                                      | 0.55                                               |
| <i>mec-3 (e1338)</i>            | YES                | 0.83                                        | <0.001                                             |
| <i>mec-4 (u253)</i>             | YES                | 0.03                                        | <0.001                                             |
| <i>cat-2 (e1112)*</i>           | NO                 | <0.001                                      | 0.54                                               |
| <i>cat-2 (n4547)*</i>           | NO                 | <0.001                                      | 0.94                                               |
| <i>cat-2 (e1112), dopamine*</i> | YES                | 0.32                                        | <0.001                                             |
| <i>dop-1(vs101)*</i>            | NO                 | <0.001                                      | 0.47                                               |
| <i>dop-2(vs105)*</i>            | NO                 | <0.001                                      | 0.55                                               |
| <i>dop-3(vs106)*</i>            | NO                 | <0.001                                      | 0.59                                               |

\* Indicates that the datasets were compared at 40 mm beneath the surface. All others were at 200 mm beneath the liquid surface.
